# Supplementary material for: Hepatic stellate cells contribute to progenitor cells and liver regeneration
Source: JCI journal article supplement (doi:10.1172/jci74119), 2014-11-16
Supplement: sd1 [file 1]

## Supplemental Information

### Material and Methods

#### *Cell isolation and culture*

HSC were isolated from adult male Wistar rats (>500 g), which were obtained from the animal facility of the Heinrich Heine University (Düsseldorf, Germany). Stellate cells were enriched by density gradient centrifugation (8% Nycodenz, #1002424, Nycomed Pharma, Oslo, Norway) after enzymatic digestion of the liver essentially as described (43). HSC were cultured in Dulbecco's Modified Eagle Medium (DMEM, #41966-029, Gibco, Invitrogen, Karlsruhe, Germany) supplemented with 10% fetal calf serum (FCS) and 1% antibiotic/antimycotic solution (#15240-062, Gibco). Isolated HSC were also maintained as single cell clones for several months as described for pancreatic stellate cells (24). Stem cells from the umbilical cord blood of unborn Wistar rats (18-20 days *post coitum*) were collected by flushing out the umbilical cord with culture medium. The cord blood cells were then maintained as single cell clones for several months and analyzed for stem/progenitor cell marker expression (38). The umbilical cord blood stem cells (UCBSC) were cultured in Dulbecco's Modified Eagle Medium Nutrient Mixture F-12 (DMEM/F12, #11330-032, Gibco) supplemented with 15% FCS (#06902, Stem Cell Technologies) and 1% antibiotic/antimycotic solution (Gibco). MSC from the bone marrow of adult rats were obtained by flushing out the humeri with 0.5 mM ethylenediaminetetraacetic acid (#8043.3, Carl Roth, Karlsruhe, Germany) dissolved in phosphate buffered saline containing 2% FCS. Bone marrow cells were filtered, washed by centrifugation and blood cell lineages were depleted by using antibodies against CD3 (#MCA772F), CD45RA (#MCA340FT), CD161 (#MCA1427F, AbD Serotec, Oxford, UK) and CD11b (#SM1764F, Acris, Herford, Germany) coupled to fluorescein isothiocyanate (FITC) and the FITC EasySep selection Kit (#18558, Stem Cell Technologies, Vancouver, Canada). Bone marrow cells that remained unselected by this method were seeded on plastic dishes coated with collagen type 1 (#356401, BD Biosciences,

Heidelberg, Germany), cultured in MSC expansion medium (#CCM004; StemXVivo Mesenchymal Stem Cell Expansion Medium; R&D Systems) and finally characterized as MSC. Muscle fibroblasts were obtained by outgrowing from rat abdominal muscle and cultured in DMEM supplemented with 10% FCS and 1% antibiotic/antimycotic solution (Gibco) for at least 14 days before usage.

### ***Fluorescence-activated cell sorting (FACS)***

Freshly isolated HSC from eGFP<sup>+</sup> male Wistar rats (>500 g), which express eGFP under the control of a chicken  $\beta$ -actin promoter (Wistar-TgN(CAG-GFP)184Ys, Rat Resource & Research Center, University of Missouri, Columbia, MO, USA), were first enriched by density gradient centrifugation (43), collected in Iscove's Modified Dulbecco's Medium (IMDM) without phenol red (#21056023, Gibco, Invitrogen, Karlsruhe, Germany) supplemented with 2% rat serum (self-made) and immediately sorted by the flow cytometer MoFlo XDP (Beckman Coulter, Krefeld, Germany). Stellate cell suspensions were analyzed by forward and side scatter to determine single cells with equal morphology and excited by an UV laser at 355 nm to measure retinoid fluorescence at 485 nm. Cells with characteristic retinoid fluorescence were then collected in new tubes containing buffer supplemented with 2% rat serum. HSC obtained by FACS were immediately transplanted without culture. A subset of the sorted HSC was given into culture dishes for characterization by immunofluorescence.

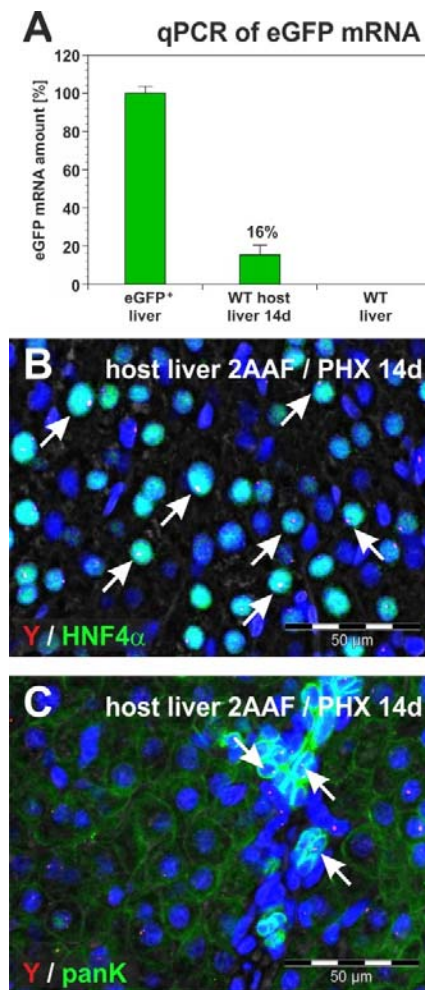

**Supplemental Figure S1** Transplanted HSC clones contributed to liver regeneration by differentiation into hepatocytes and bile duct cells.

(A) Analysis of eGFP mRNA amounts by qPCR in liver samples of wild type (WT) rats that underwent PHX in the presence of 2AAF 14 days after transplantation of different HSC clones ( $n = 4$ ). Liver samples of eGFP positive rats and wild type rats served as positive (100%) and negative (0%) controls ( $n = 3$ ). FISH analysis of chromosome Y (red) and immunofluorescence of (B) HNF4 $\alpha$  and (C) panCK (green) on liver sections of female host rats (2AAF/PHX model) that received HSC clones from male rats (14 days of liver regeneration). Cells with chromosome Y and HNF4 $\alpha$  or panCK are indicated by an arrow (zone 1). The chromosome Y (red) appears white when HNF4 $\alpha$  (green) and DAPI (blue) is co-stained.

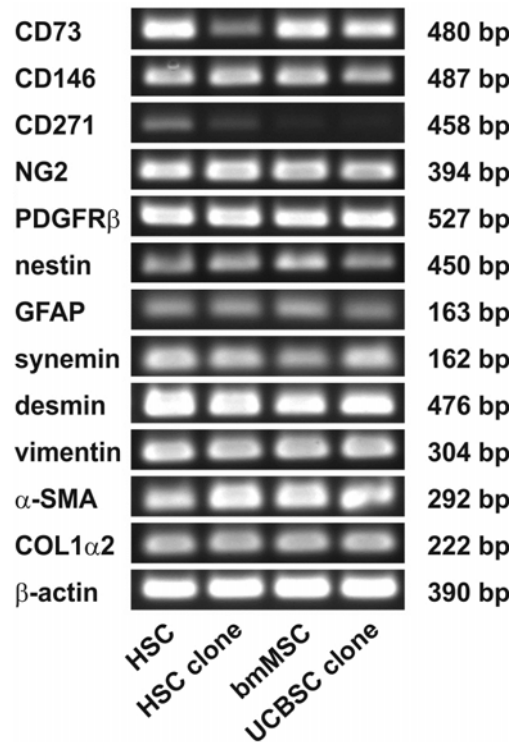

**Supplemental Figure S2** Characterization of HSC, HSC clones, bmMSC and UCBSC.

The expression of MSC (CD73, CD146, CD271, neural-glial antigen 2/NG2, platelet-derived growth factor receptor  $\beta$ /PDGFR $\beta$ , nestin) and stellate cell markers (GFAP, synemin, desmin, vimentin,  $\alpha$ -SMA, procollagen type 1  $\alpha$ 2 chain/COL1 $\alpha$ 2) by HSC, HSC clone (1E7), bmMSC and UCBSC clone (1G11) was investigated by RT-PCR and demonstrated similar characteristics.

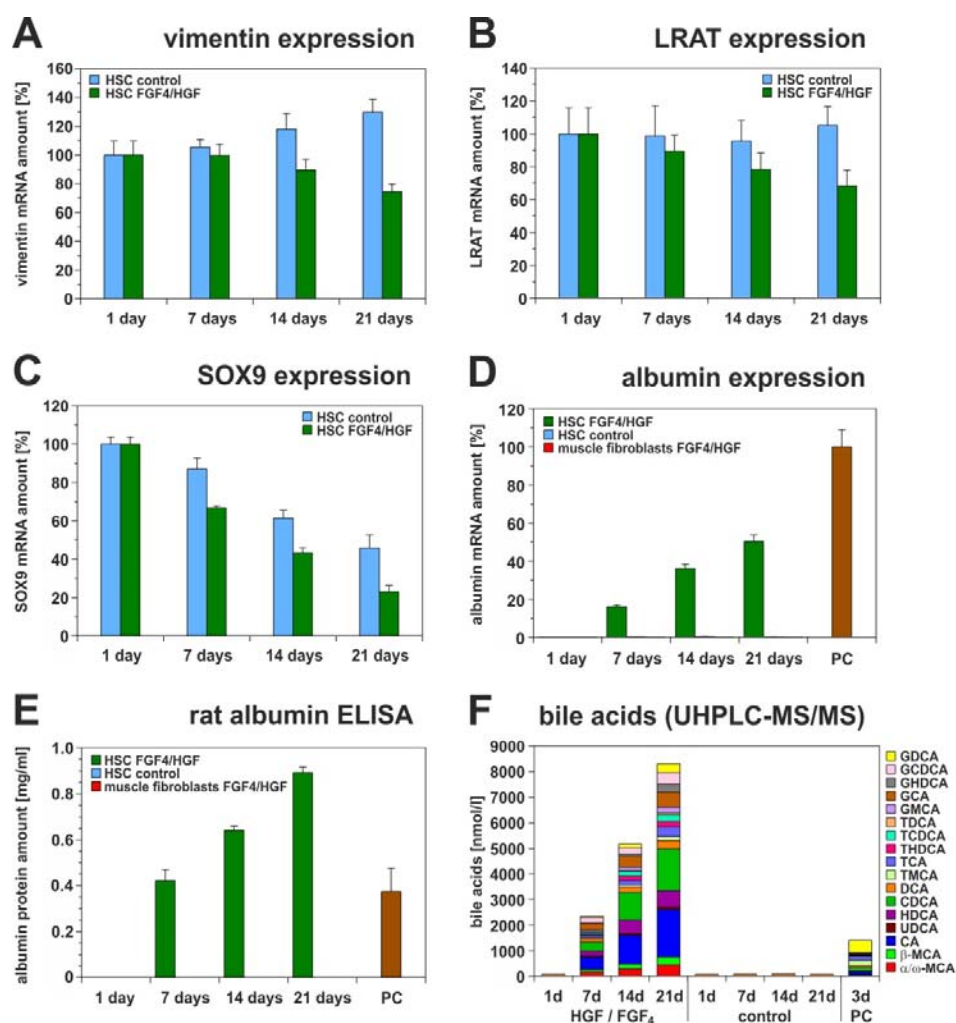

**Supplemental Figure S3** Growth factor treated hepatic stellate cells (HSC) differentiate into hepatocyte-like cells in vitro.

The mRNA levels of (A) vimentin, (B) LRAT and (C) SOX9 were analyzed by qPCR in HSC treated with or without (control) the growth factors FGF4 and HGF during 21 days (n = 3). (D, E) HSC and muscle fibroblasts of rats were treated with FGF<sub>4</sub> and HGF for 21 days. HSC were also cultured for 21 days without growth factors (control). (D) The mRNA amount of albumin was determined by qPCR in weekly intervals (n = 3). The albumin mRNA level of rat hepatocytes (parenchymal cells/PC) cultured for 3 days served as a positive control. In the same experiments, (E) the albumin protein and (F) bile acid content of the culture medium was determined by ELISA or UHPLC-MS/MS, respectively (n = 3).

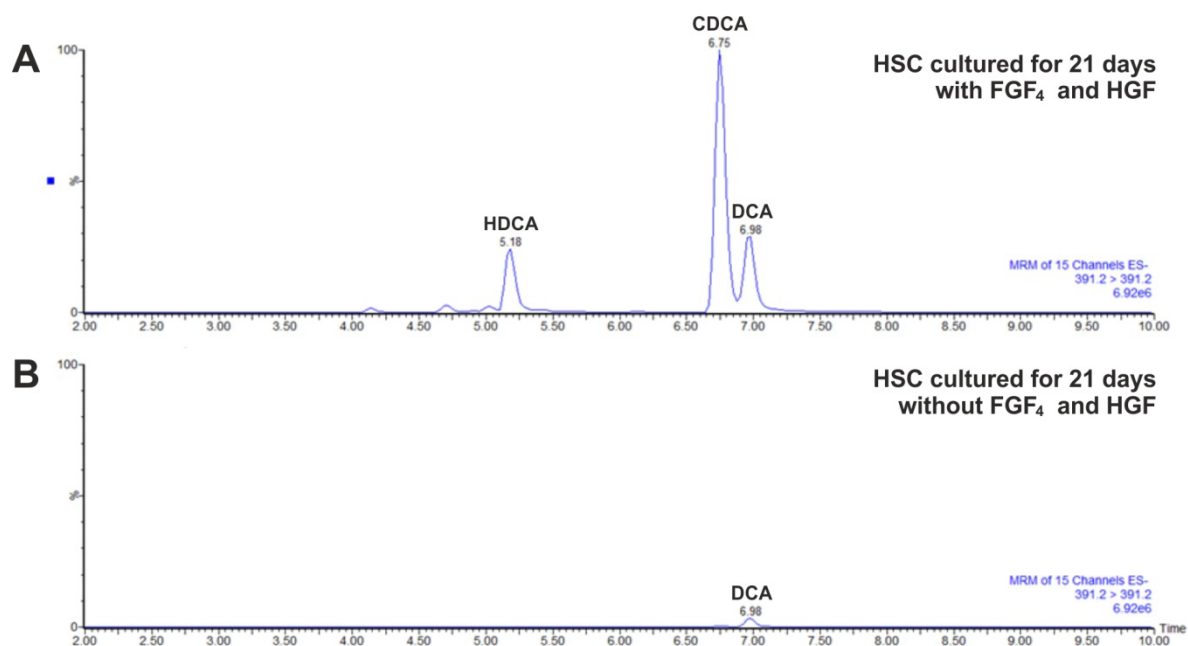

**Supplemental Figure S4** Quantitation of bile acid synthesis in primary cultures of HSC by UHPLC-MS/MS.

The bile acids hyodeoxycholic acid (HDCA), chenodeoxycholic acid (CDCA) and deoxycholic acid (DCA) were analyzed by UHPLC-MS/MS in culture supernatants of HSC after 21 days in the **(A)** presence and **(B)** absence (control) of the growth factors HGF and FGF<sub>4</sub>. Traces of DCA were also detectable in freshly prepared medium without cultured cells (not shown).

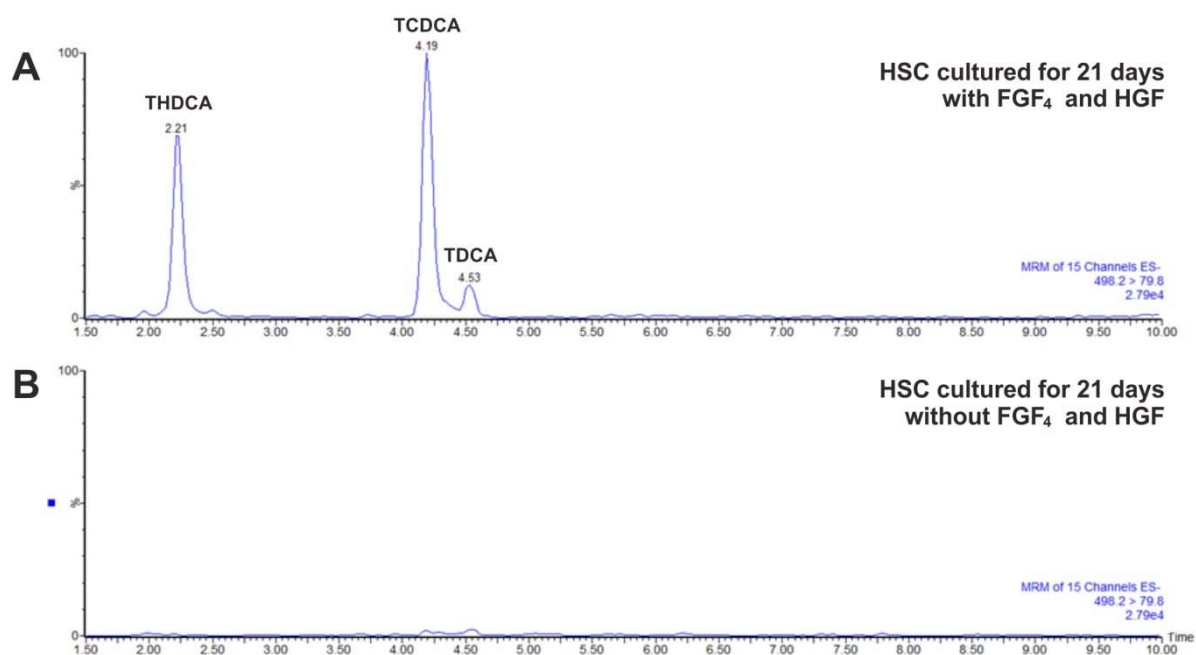

**Supplemental Figure S5** Quantitation of bile acid synthesis in primary cultures of HSC by UHPLC-MS/MS.

The bile acids taurohyodeoxycholic acid (THDCA), taurochenodeoxycholic acid TCDCA and taurodeoxycholic acid (TDCA) were analyzed by UHPLC-MS/MS in culture supernatants of HSC after 21 days in the **(A)** presence and **(B)** absence (control) of the growth factors HGF and FGF<sub>4</sub>.

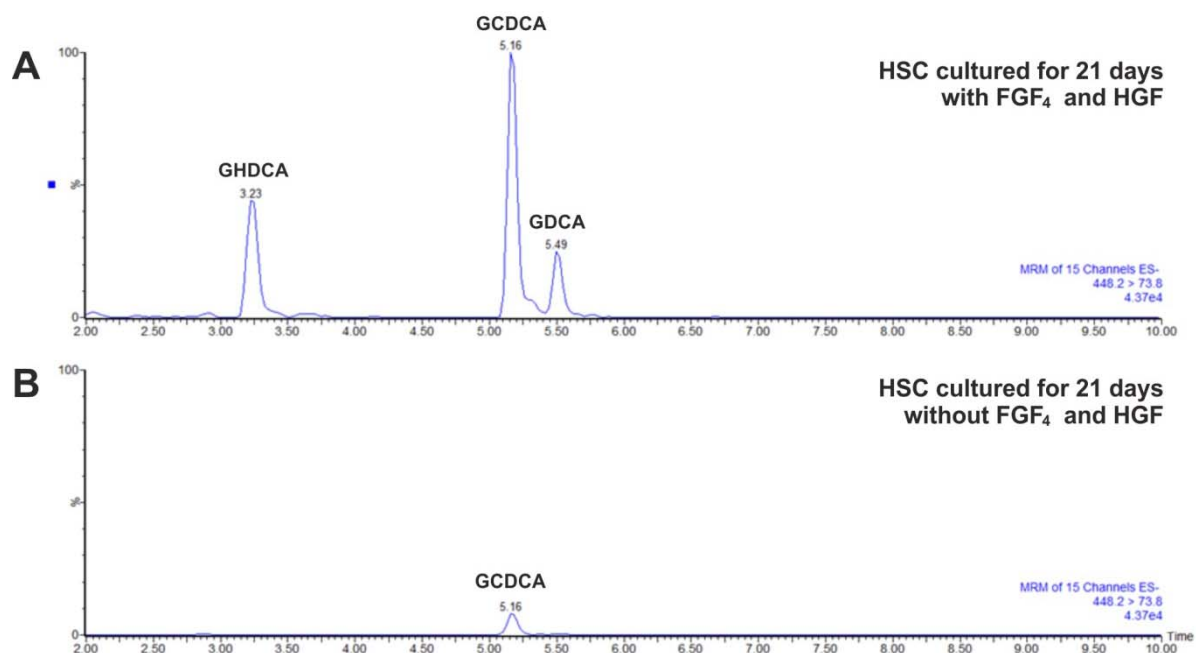

**Supplemental Figure S6** Quantitation of bile acid synthesis in primary cultures of HSC by UHPLC-MS/MS.

The bile acids glycohyodeoxycholic acid (GHDCA), glycochenodeoxy cholic acid (GCDCA) and glycodeoxycholic acid (GDCA) were analyzed by UHPLC-MS/MS in culture supernatants of HSC after 21 days in the **(A)** presence and **(B)** absence (control) of the growth factors HGF and FGF<sub>4</sub>. Traces of GCDCA were also detectable in freshly prepared medium without cultured cells (not shown).

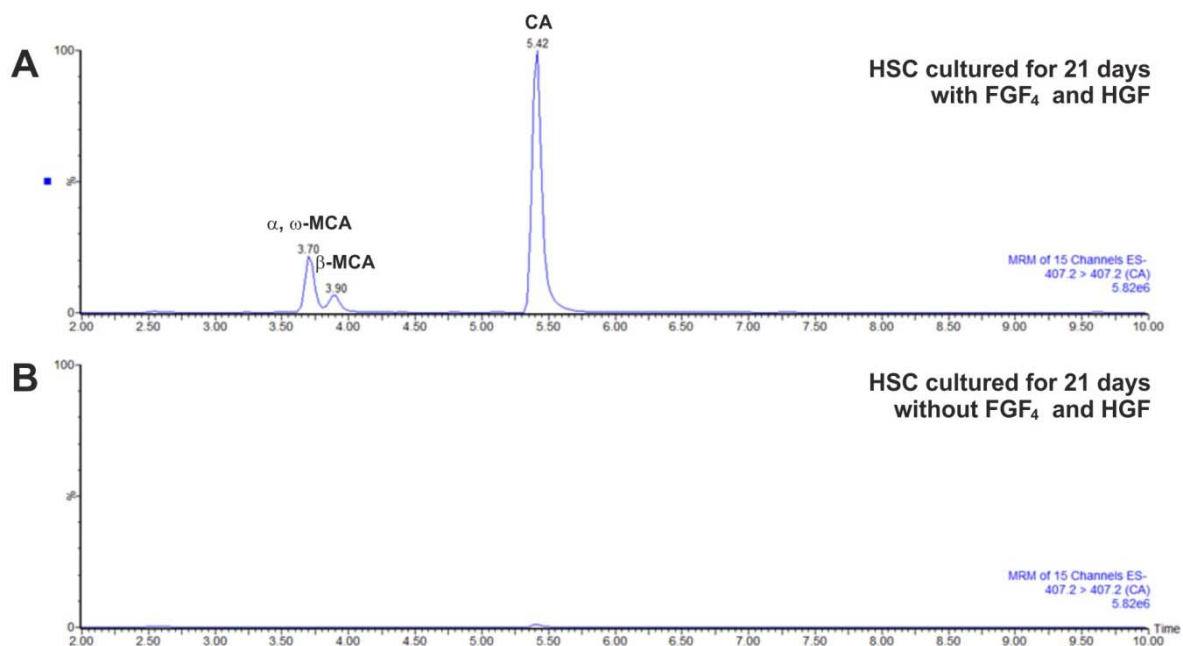

**Supplemental Figure S7** Quantitation of bile acid synthesis in primary cultures of HSC by UHPLC-MS/MS.

The bile acids  $\alpha/\omega$ -muricholic acid ( $\alpha/\omega$ -MCA),  $\beta$ -muricholic acid ( $\beta$ -MCA) and cholic acid (CA) were analyzed by UHPLC-MS/MS in culture supernatants of HSC after 21 days in the **(A)** presence and **(B)** absence (control) of the growth factors HGF and FGF<sub>4</sub>.

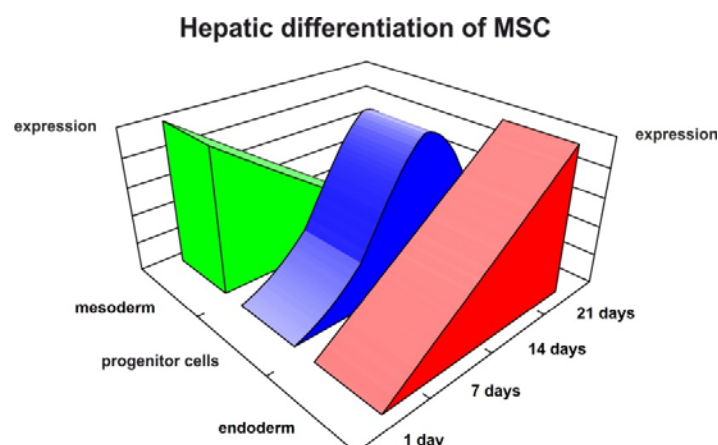

**Supplemental Figure S8** Schematic presentation of the mesodermal to endodermal transition during hepatic differentiation of MSC.

This figure schematically depicts the changes in gene expression of MSC populations such as HSC, HSC clones, bmMSC and UCBSC during their differentiation into hepatocytes (endoderm), as shown in [Figure 7](#). During this process, MSC lose mesodermal characteristics (green; vimentin, desmin) while they transiently acquire the expression profile of oval cells (blue; EPCAM, K19,  $\alpha$ -fetoprotein) before becoming hepatocytes (red; albumin, CYP7A1, HNF4 $\alpha$ , bile acids).

**Supplemental Table S1** Engraftment of retransplanted eGFP<sup>+</sup> HSC-derived bone marrow cells varied in different areas of the WT host livers.

The abundance of transplanted HSC-derived bone marrow cells was analysed by qPCR of eGFP mRNA in 6 different areas of the WT host liver (edges and central parts of various liver lobes). Livers from eGFP (100%) and WT rats (0%) were used for normalization.

| eGFP mRNA (%) |          |          |          |          |          |          |                 |
|---------------|----------|----------|----------|----------|----------|----------|-----------------|
| liver tissue  | sample 1 | sample 2 | sample 3 | sample 4 | sample 5 | sample 6 | mean 1-6        |
| WT host rat 1 | 14.3     | 8.8      | 6.1      | 9.7      | 8.9      | 10.7     | 10 ( $\pm$ 1.1) |
| WT host rat 2 | 14.1     | 13.3     | 14.0     | 14.0     | 12.5     | 28.0     | 16 ( $\pm$ 2.4) |
| WT host rat 3 | 11.7     | 43.5     | 0.01     | 33.0     | 34.7     | 29.3     | 25 ( $\pm$ 6.6) |

**Supplemental Table S2** Bile acid concentrations in culture supernatants of HSC primary cultures during hepatic differentiation. The HSC were treated with HGF and FGF<sub>4</sub> for 21 days. As for control ("21 days control"), cells received the same medium but without growth factors. Data are given as means  $\pm$  SEM (n = 3 independent experiments).

| bile acid concentration<br>[nmol/ml $\pm$ SEM] | HSC<br>1 day | HSC<br>7 days   | HSC<br>14 days   | HSC<br>21 days    | HSC<br>21 days control |
|------------------------------------------------|--------------|-----------------|------------------|-------------------|------------------------|
| cholic acid                                    | 2 ( $\pm$ 1) | 242 ( $\pm$ 6)  | 827 ( $\pm$ 50)  | 1455 ( $\pm$ 167) | 1 ( $\pm$ 1)           |
| chenodeoxycholic acid                          | 1 ( $\pm$ 1) | 250 ( $\pm$ 21) | 1007 ( $\pm$ 69) | 1503 ( $\pm$ 109) | 1 ( $\pm$ 1)           |
| ursodeoxycholic acid                           | 0 ( $\pm$ 0) | 9 ( $\pm$ 1)    | 35 ( $\pm$ 2)    | 51 ( $\pm$ 3)     | 0 ( $\pm$ 0)           |
| $\alpha/\omega$ -muricholic acid               | 0 ( $\pm$ 0) | 45 ( $\pm$ 3)   | 145 ( $\pm$ 3)   | 225 ( $\pm$ 15)   | 1 ( $\pm$ 1)           |
| $\beta$ -muricholic acid                       | 1 ( $\pm$ 1) | 46 ( $\pm$ 5)   | 158 ( $\pm$ 6)   | 197 ( $\pm$ 13)   | 0 ( $\pm$ 0)           |
| murideoxycholic acid                           | 0 ( $\pm$ 0) | 5 ( $\pm$ 1)    | 18 ( $\pm$ 4)    | 34 ( $\pm$ 4)     | 0 ( $\pm$ 0)           |
| hyodeoxycholic acid                            | 0 ( $\pm$ 0) | 135 ( $\pm$ 11) | 571 ( $\pm$ 44)  | 1170 ( $\pm$ 55)  | 0 ( $\pm$ 0)           |
| deoxycholic acid                               | 0 ( $\pm$ 0) | 164 ( $\pm$ 11) | 197 ( $\pm$ 14)  | 255 ( $\pm$ 17)   | 0 ( $\pm$ 0)           |
| lithocholic acid                               | 0 ( $\pm$ 0) | 9 ( $\pm$ 1)    | 27 ( $\pm$ 3)    | 42 ( $\pm$ 3)     | 0 ( $\pm$ 0)           |
| tauromuricholic acid                           | 2 ( $\pm$ 1) | 10 ( $\pm$ 2)   | 32 ( $\pm$ 4)    | 48 ( $\pm$ 4)     | 0 ( $\pm$ 0)           |
| taurocholic acid                               | 3 ( $\pm$ 1) | 69 ( $\pm$ 7)   | 128 ( $\pm$ 12)  | 156 ( $\pm$ 6)    | 3 ( $\pm$ 1)           |
| taurohyodeoxycholic acid                       | 0 ( $\pm$ 0) | 21 ( $\pm$ 4)   | 69 ( $\pm$ 3)    | 116 ( $\pm$ 12)   | 0 ( $\pm$ 0)           |
| taurochenodeoxycholic acid                     | 0 ( $\pm$ 0) | 17 ( $\pm$ 1)   | 58 ( $\pm$ 4)    | 102 ( $\pm$ 8)    | 0 ( $\pm$ 0)           |
| taurodeoxycholic acid                          | 0 ( $\pm$ 0) | 6 ( $\pm$ 1)    | 11 ( $\pm$ 1)    | 14 ( $\pm$ 1)     | 0 ( $\pm$ 0)           |
| glycomuricholic acid                           | 0 ( $\pm$ 0) | 20 ( $\pm$ 3)   | 86 ( $\pm$ 4)    | 108 ( $\pm$ 5)    | 0 ( $\pm$ 0)           |
| glycocholic acid                               | 2 ( $\pm$ 1) | 96 ( $\pm$ 13)  | 337 ( $\pm$ 20)  | 366 ( $\pm$ 19)   | 3 ( $\pm$ 1)           |
| glycohyodeoxycholic acid                       | 0 ( $\pm$ 0) | 17 ( $\pm$ 0)   | 61 ( $\pm$ 6)    | 85 ( $\pm$ 3)     | 0 ( $\pm$ 0)           |
| glycochenodeoxy cholic acid                    | 0 ( $\pm$ 0) | 39 ( $\pm$ 2)   | 119 ( $\pm$ 20)  | 151 ( $\pm$ 13)   | 0 ( $\pm$ 0)           |
| glycodeoxycholic acid                          | 0 ( $\pm$ 0) | 8 ( $\pm$ 1)    | 23 ( $\pm$ 4)    | 39 ( $\pm$ 4)     | 0 ( $\pm$ 0)           |

The bile acids hyocholic acid, 7-oxo-deoxycholic acid, dehydrocholic acid, lithocholic acid sulphate, glycohyocholic acid, glyoursodeoxy cholic acid, glycolithocholic acid, taurohyocholic acid, taoursodeoxycholic acid and tauroolithocholic acid were also analyzed, but remained undetectable in the culture supernatants (not shown).

**Supplemental Table S3** Bile acid concentration in culture supernatants of HSC clones during hepatic differentiation. The HSC clones were treated with HGF and FGF<sub>4</sub> for 21 days. As for control (“21 days control”), cells received the same medium but without growth factors. Data are given as means  $\pm$  SEM (n = 3 independent experiments).

| bile acid concentration<br>[nmol/ml $\pm$ SEM] | HSC clones<br>1 day | HSC clones<br>7 days | HSC clones<br>14 days | HSC clones<br>21 days | HSC clones<br>21 days control |
|------------------------------------------------|---------------------|----------------------|-----------------------|-----------------------|-------------------------------|
| cholic acid                                    | 0 ( $\pm$ 0)        | 207 ( $\pm$ 2)       | 511 ( $\pm$ 8)        | 838 ( $\pm$ 115)      | 0 ( $\pm$ 0)                  |
| chenodeoxycholic acid                          | 0 ( $\pm$ 0)        | 216 ( $\pm$ 10)      | 615 ( $\pm$ 51)       | 920 ( $\pm$ 83)       | 0 ( $\pm$ 0)                  |
| ursodeoxycholic acid                           | 0 ( $\pm$ 0)        | 7 ( $\pm$ 1)         | 15 ( $\pm$ 15)        | 29 ( $\pm$ 3)         | 0 ( $\pm$ 0)                  |
| $\alpha/\omega$ -muricholic acid               | 0 ( $\pm$ 0)        | 31 ( $\pm$ 7)        | 83 ( $\pm$ 11)        | 145 ( $\pm$ 5)        | 0 ( $\pm$ 0)                  |
| $\beta$ -muricholic acid                       | 0 ( $\pm$ 0)        | 30 ( $\pm$ 5)        | 73 ( $\pm$ 6)         | 124 ( $\pm$ 5)        | 0 ( $\pm$ 0)                  |
| murideoxycholic acid                           | 0 ( $\pm$ 0)        | 4 ( $\pm$ 0)         | 11 ( $\pm$ 1)         | 17 ( $\pm$ 3)         | 0 ( $\pm$ 0)                  |
| hyodeoxycholic acid                            | 0 ( $\pm$ 0)        | 134 ( $\pm$ 5)       | 377 ( $\pm$ 38)       | 564 ( $\pm$ 88)       | 0 ( $\pm$ 0)                  |
| deoxycholic acid                               | 0 ( $\pm$ 0)        | 139 ( $\pm$ 17)      | 171 ( $\pm$ 18)       | 193 ( $\pm$ 1)        | 0 ( $\pm$ 0)                  |
| lithocholic acid                               | 0 ( $\pm$ 0)        | 7 ( $\pm$ 2)         | 17 ( $\pm$ 1)         | 26 ( $\pm$ 2)         | 0 ( $\pm$ 0)                  |
| taumuricholic acid                             | 0 ( $\pm$ 0)        | 6 ( $\pm$ 1)         | 14 ( $\pm$ 1)         | 20 ( $\pm$ 4)         | 0 ( $\pm$ 0)                  |
| taurocholic acid                               | 0 ( $\pm$ 0)        | 18 ( $\pm$ 1)        | 49 ( $\pm$ 4)         | 68 ( $\pm$ 6)         | 0 ( $\pm$ 0)                  |
| taurohyodeoxycholic acid                       | 0 ( $\pm$ 0)        | 17 ( $\pm$ 3)        | 50 ( $\pm$ 4)         | 75 ( $\pm$ 11)        | 0 ( $\pm$ 0)                  |
| taurochenodeoxycholic acid                     | 0 ( $\pm$ 0)        | 16 ( $\pm$ 1)        | 45 ( $\pm$ 4)         | 64 ( $\pm$ 8)         | 0 ( $\pm$ 0)                  |
| taurodeoxycholic acid                          | 0 ( $\pm$ 0)        | 2 ( $\pm$ 1)         | 7 ( $\pm$ 1)          | 8 ( $\pm$ 2)          | 0 ( $\pm$ 0)                  |
| glycomuricholic acid                           | 0 ( $\pm$ 0)        | 17 ( $\pm$ 2)        | 47 ( $\pm$ 6)         | 61 ( $\pm$ 2)         | 0 ( $\pm$ 0)                  |
| glycocholic acid                               | 0 ( $\pm$ 0)        | 63 ( $\pm$ 1)        | 168 ( $\pm$ 8)        | 226 ( $\pm$ 8)        | 0 ( $\pm$ 0)                  |
| glycohyodeoxycholic acid                       | 0 ( $\pm$ 0)        | 16 ( $\pm$ 2)        | 40 ( $\pm$ 4)         | 74 ( $\pm$ 10)        | 0 ( $\pm$ 0)                  |
| glycochenodeoxy cholic acid                    | 0 ( $\pm$ 0)        | 38 ( $\pm$ 6)        | 76 ( $\pm$ 10)        | 118 ( $\pm$ 24)       | 0 ( $\pm$ 0)                  |
| glycodeoxycholic acid                          | 0 ( $\pm$ 0)        | 8 ( $\pm$ 3)         | 11 ( $\pm$ 1)         | 21 ( $\pm$ 1)         | 0 ( $\pm$ 0)                  |

The bile acids hyocholic acid, 7-oxo-deoxycholic acid, dehydrocholic acid, lithocholic acid sulphate, glychoyocholic acid, glyoursodeoxy cholic acid, glycolithocholic acid, taurohyocholic acid, taoursodeoxycholic acid and tauroolithocholic acid were also analyzed, but remained undetectable in the culture supernatants (not shown).

**Supplemental Table S4** Bile acid concentration in culture supernatants of bmMSC during hepatic differentiation. The bmMSC were treated with HGF and FGF<sub>4</sub> for 21 days. As for control (“21 days control”), cells received the same medium but without growth factors. Data are given as means  $\pm$  SEM (n = 3 independent experiments).

| bile acid concentration<br>[nmol/ml $\pm$ SEM] | bmMSC<br>1 day | bmMSC<br>7 days | bmMSC<br>14 days | bmMSC<br>21 days  | bmMSC<br>21 days control |
|------------------------------------------------|----------------|-----------------|------------------|-------------------|--------------------------|
| cholic acid                                    | 0 ( $\pm$ 0)   | 211 ( $\pm$ 13) | 684 ( $\pm$ 62)  | 901 ( $\pm$ 101)  | 0 ( $\pm$ 0)             |
| chenodeoxycholic acid                          | 0 ( $\pm$ 0)   | 255 ( $\pm$ 31) | 627 ( $\pm$ 39)  | 1159 ( $\pm$ 104) | 0 ( $\pm$ 0)             |
| ursodeoxycholic acid                           | 0 ( $\pm$ 0)   | 6 ( $\pm$ 2)    | 29 ( $\pm$ 3)    | 38 ( $\pm$ 5)     | 0 ( $\pm$ 0)             |
| $\alpha/\omega$ -muricholic acid               | 0 ( $\pm$ 0)   | 32 ( $\pm$ 5)   | 118 ( $\pm$ 10)  | 160 ( $\pm$ 10)   | 0 ( $\pm$ 0)             |
| $\beta$ -muricholic acid                       | 0 ( $\pm$ 0)   | 24 ( $\pm$ 5)   | 72 ( $\pm$ 20)   | 140 ( $\pm$ 8)    | 0 ( $\pm$ 0)             |
| murideoxycholic acid                           | 0 ( $\pm$ 0)   | 4 ( $\pm$ 0)    | 15 ( $\pm$ 4)    | 17 ( $\pm$ 2)     | 0 ( $\pm$ 0)             |
| hyodeoxycholic acid                            | 0 ( $\pm$ 0)   | 166 ( $\pm$ 30) | 584 ( $\pm$ 110) | 807 ( $\pm$ 101)  | 0 ( $\pm$ 0)             |
| deoxycholic acid                               | 0 ( $\pm$ 0)   | 134 ( $\pm$ 2)  | 156 ( $\pm$ 20)  | 191 ( $\pm$ 6)    | 0 ( $\pm$ 0)             |
| lithocholic acid                               | 0 ( $\pm$ 0)   | 9 ( $\pm$ 1)    | 21 ( $\pm$ 5)    | 29 ( $\pm$ 4)     | 0 ( $\pm$ 0)             |
| tauromuricholic acid                           | 0 ( $\pm$ 0)   | 5 ( $\pm$ 1)    | 15 ( $\pm$ 3)    | 25 ( $\pm$ 4)     | 0 ( $\pm$ 0)             |
| taurocholic acid                               | 0 ( $\pm$ 0)   | 23 ( $\pm$ 3)   | 59 ( $\pm$ 10)   | 94 ( $\pm$ 9)     | 0 ( $\pm$ 0)             |
| taurohyodeoxycholic acid                       | 0 ( $\pm$ 0)   | 24 ( $\pm$ 3)   | 63 ( $\pm$ 9)    | 107 ( $\pm$ 11)   | 0 ( $\pm$ 0)             |
| taurochenodeoxycholic acid                     | 0 ( $\pm$ 0)   | 19 ( $\pm$ 3)   | 47 ( $\pm$ 5)    | 78 ( $\pm$ 5)     | 0 ( $\pm$ 0)             |
| taurodeoxycholic acid                          | 0 ( $\pm$ 0)   | 4 ( $\pm$ 0)    | 6 ( $\pm$ 1)     | 11 ( $\pm$ 1)     | 0 ( $\pm$ 0)             |
| glycomuricholic acid                           | 0 ( $\pm$ 0)   | 16 ( $\pm$ 3)   | 54 ( $\pm$ 1)    | 89 ( $\pm$ 4)     | 0 ( $\pm$ 0)             |
| glycocholic acid                               | 0 ( $\pm$ 0)   | 74 ( $\pm$ 5)   | 173 ( $\pm$ 2)   | 301 ( $\pm$ 17)   | 0 ( $\pm$ 0)             |
| glycohyodeoxycholic acid                       | 0 ( $\pm$ 0)   | 17 ( $\pm$ 2)   | 64 ( $\pm$ 9)    | 63 ( $\pm$ 3)     | 0 ( $\pm$ 0)             |
| glycochenodeoxy cholic acid                    | 0 ( $\pm$ 0)   | 40 ( $\pm$ 6)   | 81 ( $\pm$ 10)   | 128 ( $\pm$ 14)   | 0 ( $\pm$ 0)             |
| glycodeoxycholic acid                          | 0 ( $\pm$ 0)   | 6 ( $\pm$ 1)    | 16 ( $\pm$ 1)    | 27 ( $\pm$ 1)     | 0 ( $\pm$ 0)             |

The bile acids hyocholic acid, 7-oxo-deoxycholic acid, dehydrocholic acid, lithocholic acid sulphate, glycohyocholic acid, glyoursodeoxy cholic acid, glycolithocholic acid, taurohyocholic acid, taoursodeoxycholic acid and tauroolithocholic acid were also analyzed, but remained undetectable in the culture supernatants (not shown).

**Supplemental Table S5** Bile acid concentration in culture supernatants of UCBSC during hepatic differentiation. The UCBSC were treated with HGF and FGF<sub>4</sub> for 21 days. As for control (“21 days control”), cells received the same medium but without growth factors. Data are given as means  $\pm$  SEM (n = 3 independent experiments).

| bile acid concentration<br>[nmol/ml $\pm$ SEM] | UCBSC<br>1 day | UCBSC<br>7 days | UCBSC<br>14 days | UCBSC<br>21 days | UCBSC<br>21 days control |
|------------------------------------------------|----------------|-----------------|------------------|------------------|--------------------------|
| cholic acid                                    | 0 ( $\pm$ 0)   | 180 ( $\pm$ 15) | 371 ( $\pm$ 23)  | 699 ( $\pm$ 47)  | 1 ( $\pm$ 1)             |
| chenodeoxycholic acid                          | 0 ( $\pm$ 0)   | 194 ( $\pm$ 3)  | 386 ( $\pm$ 4)   | 754 ( $\pm$ 6)   | 0 ( $\pm$ 0)             |
| ursodeoxycholic acid                           | 0 ( $\pm$ 0)   | 4 ( $\pm$ 1)    | 12 ( $\pm$ 1)    | 24 ( $\pm$ 2)    | 0 ( $\pm$ 0)             |
| $\alpha/\omega$ -muricholic acid               | 0 ( $\pm$ 0)   | 36 ( $\pm$ 1)   | 59 ( $\pm$ 5)    | 99 ( $\pm$ 3)    | 0 ( $\pm$ 0)             |
| $\beta$ -muricholic acid                       | 0 ( $\pm$ 0)   | 28 ( $\pm$ 4)   | 52 ( $\pm$ 4)    | 80 ( $\pm$ 8)    | 0 ( $\pm$ 0)             |
| murideoxycholic acid                           | 0 ( $\pm$ 0)   | 5 ( $\pm$ 1)    | 10 ( $\pm$ 0)    | 17 ( $\pm$ 1)    | 0 ( $\pm$ 0)             |
| hyodeoxycholic acid                            | 0 ( $\pm$ 0)   | 140 ( $\pm$ 15) | 312 ( $\pm$ 3)   | 585 ( $\pm$ 14)  | 0 ( $\pm$ 0)             |
| deoxycholic acid                               | 3 ( $\pm$ 1)   | 159 ( $\pm$ 5)  | 178 ( $\pm$ 4)   | 181 ( $\pm$ 3)   | 3 ( $\pm$ 1)             |
| lithocholic acid                               | 0 ( $\pm$ 0)   | 8 ( $\pm$ 1)    | 14 ( $\pm$ 2)    | 22 ( $\pm$ 1)    | 0 ( $\pm$ 0)             |
| tauromuricholic acid                           | 0 ( $\pm$ 0)   | 4 ( $\pm$ 0)    | 8 ( $\pm$ 1)     | 15 ( $\pm$ 1)    | 0 ( $\pm$ 0)             |
| taurocholic acid                               | 0 ( $\pm$ 0)   | 19 ( $\pm$ 1)   | 30 ( $\pm$ 2)    | 52 ( $\pm$ 6)    | 0 ( $\pm$ 0)             |
| taurohyodeoxycholic acid                       | 0 ( $\pm$ 0)   | 13 ( $\pm$ 2)   | 30 ( $\pm$ 2)    | 56 ( $\pm$ 4)    | 0 ( $\pm$ 0)             |
| taurochenodeoxycholic acid                     | 0 ( $\pm$ 0)   | 13 ( $\pm$ 1)   | 25 ( $\pm$ 2)    | 47 ( $\pm$ 0)    | 0 ( $\pm$ 0)             |
| taurodeoxycholic acid                          | 0 ( $\pm$ 0)   | 2 ( $\pm$ 1)    | 4 ( $\pm$ 0)     | 6 ( $\pm$ 1)     | 0 ( $\pm$ 0)             |
| glycomuricholic acid                           | 0 ( $\pm$ 0)   | 13 ( $\pm$ 2)   | 25 ( $\pm$ 4)    | 53 ( $\pm$ 1)    | 0 ( $\pm$ 0)             |
| glycocholic acid                               | 0 ( $\pm$ 0)   | 46 ( $\pm$ 6)   | 91 ( $\pm$ 5)    | 187 ( $\pm$ 17)  | 0 ( $\pm$ 0)             |
| glycohyodeoxycholic acid                       | 0 ( $\pm$ 0)   | 11 ( $\pm$ 1)   | 24 ( $\pm$ 1)    | 42 ( $\pm$ 5)    | 0 ( $\pm$ 0)             |
| glycochenodeoxy cholic acid                    | 0 ( $\pm$ 0)   | 30 ( $\pm$ 3)   | 44 ( $\pm$ 2)    | 79 ( $\pm$ 0)    | 0 ( $\pm$ 0)             |
| glycodeoxycholic acid                          | 0 ( $\pm$ 0)   | 10 ( $\pm$ 1)   | 12 ( $\pm$ 2)    | 18 ( $\pm$ 3)    | 0 ( $\pm$ 0)             |

The bile acids hyocholic acid, 7-oxo-deoxycholic acid, dehydrocholic acid, lithocholic acid sulphate, glychoyocholic acid, glyoursodeoxy cholic acid, glycolithocholic acid, taurohyocholic acid, taoursodeoxycholic acid and tauroolithocholic acid were also analyzed, but remained undetectable in the culture supernatants (not shown).

**Supplemental Table S6 Primers for RT-PCR**

| RT-PCR                   |                        |                         |     |               |
|--------------------------|------------------------|-------------------------|-----|---------------|
| Gene                     | Forward Primer         | Reverse Primer          | bp  | Accession No. |
| $\alpha$ -SMA            | TGCTGGACTCTGGAGATG     | GTGATCACCTGCCCATC       | 292 | X06801        |
| $\beta$ -actin           | GCCCTAGACTTCGAGCAAGA   | CAGTGAGGCCAGGATAGAGC    | 390 | NM 031144     |
| CD73                     | ACACTCTGGTTTCGAGATGGAT | ATTTTCATCTGGGTGTCTGAGGT | 480 | NM 021576     |
| CD146                    | ATCTCTGTGTGGCATCTGTCC  | ACTATCACAGCCACGATGACC   | 487 | NM 023983     |
| CD271                    | GCCTGTGGCCTATATTGCTT   | CTCGCTGCATAGACTCTCCAC   | 458 | NM 012610     |
| procollagen I $\alpha$ 2 | ACCTCAGGGTGTTCAGGTG    | CGGATTCCAATAGGACCAGA    | 222 | NM 053356     |
| desmin                   | GACCTAGAGCGCAGAATTGAGT | GCCATCTCATCCTTTAGGTGTC  | 476 | NM 022531     |
| GFAP                     | ACATCGAGATCGCCACCTAC   | TCCACCGTCTTTACCACGAT    | 163 | L27219        |
| eGFP                     | AGGACGACGGCAACTACAAG   | CTGGGTGCTCAGGTAGTGGT    | 311 | EU056364      |
| nestin                   | GAGTGTGCTTAGAGGTGCAA   | TGTACAGGAGTCTCAAGGGTA   | 450 | NM 012987     |
| NG2                      | CTGAGGTGAATGCTGGGAATA  | GTCAGCTCAGATTGCAGGAAG   | 394 | NM 031022     |
| PDGFR $\beta$            | ACACTCCAACAAGCATTGTCC  | GGCTGTTGAAGATGCTCTCTG   | 527 | AF359356      |
| synemin                  | GATCTGGACCGAGAACATTGA  | CCGTTGGAATACAAAGTCGAG   | 162 | NM 001134858  |
| UGT1A1                   | CCAGGAATTGTAAGCCTATGTC | CGCATGATGTTCTCCTTGTAAC  | 465 | NM 012683     |
| vimentin                 | GAACGTAAAGTGAATCCTTGC  | GTCTCCGGTATTTCGTTTGACTC | 304 | NM 031140     |

**Supplemental Table S7 Primers for qPCR**

| qPCR                  |                       |                         |     |               |
|-----------------------|-----------------------|-------------------------|-----|---------------|
| Gene                  | Forward Primer        | Reverse Primer          | bp  | Accession No. |
| $\alpha$ -fetoprotein | ACCTGACAGGGAAGATGGTG  | GCAGTGGTTGATACCGGAGT    | 155 | NM 012493     |
| $\beta$ -actin (DNA)  | TTAACTTTCCGCCTAGGGTGT | CCAATACTGTGTCCCCTCAAG   | 188 | NC 005111     |
| albumin               | CTTCAAAGCCTGGGCAGTAG  | GCACTGGCTTATCACAGCAA    | 221 | V01222        |
| CYP7A1                | CACCATTCTGCAACCTTTT   | GTACCGGCAGGTCATTTCAGT   | 170 | NM 012942     |
| desmin                | AGCCTGGGTCAGAGACAGAA  | TATCTCCTGCTCCACATCC     | 166 | NM 022531     |
| eGFP                  | GGGCACAAGCTGGAGTACAA  | GGGTGTTCTGCTGGTAGTGGT   | 148 | EU056364      |
| EPCAM                 | TGCATACTGCACTTCAGGACA | GGAACAAGGACTCCCCCTTTA   | 195 | NM 138541     |
| HNF4 $\alpha$         | AAATGTGCAGGTGTTGACCA  | CACGCTCCTCCTGAAGAATC    | 178 | NM 022180     |
| HPRT1                 | AAGTGTGGATACAGGCCAGA  | GGCTTTGTACTTGGCTTTTCC   | 145 | NM 012583     |
| K19                   | AGTAACGTGCGTGCTGACAC  | AGTCGCACTGGTAGCAAGGT    | 193 | NM 199498     |
| LGR5                  | TTGCAGAGCCTGATACCATCT | TCTTACGAAGGTCGTCCACAC   | 160 | NM 001106784  |
| LRAT                  | GACCTACTGCAGATACGGCTC | TATGATGCCAGGCCTGTGTAG   | 147 | NM 022280     |
| SRY (DNA)             | AGCCTCATCGAAGGGTTAAAG | GAGGACTGGTGTGCAGCTCTA   | 151 | AF274872      |
| SOX9                  | TCTCTCCTAACGCCATCTTCA | AGATCAACTTTCACAGCTTGC   | 163 | XM 001081628  |
| vimentin              | GAACGTAAAGTGAATCCTTGC | GTCTCCGGTATTTCGTTTGACTC | 304 | NM 031140     |
